# Supplementary material for: Evaluation of Salmonella Serotype Prediction With Multiplex Nanopore Sequencing
Source: PubMed Central journal article supplement (PMC7987803; doi:10.3389/fmicb.2021.637771), 2021-03-10
Supplement: Table_1.pdf [file Table_1.pdf]

**Supplementary Table 1.** The proportion of sequencing data yield of each barcode within each flow cell

| Pooling strategy | Flow cell ID | BC01   | BC02   | BC03   | BC04   | BC05   | BC07   | BC08   | BC09  | BC10  | BC11   | Mis-assigned reads | Non-assigned reads |
|------------------|--------------|--------|--------|--------|--------|--------|--------|--------|-------|-------|--------|--------------------|--------------------|
| 3 isolates       | FC01         | 29.36% | 34.95% | 27.85% | -      | -      | -      | -      | -     | -     | -      | 0.03%              | 7.82%              |
|                  | FC02         | 21.89% | 38.82% | 31.34% | -      | -      | -      | -      | -     | -     | -      | 0.03%              | 7.92%              |
|                  | FC03         | 23.74% | 32.10% | 33.92% | -      | -      | -      | -      | -     | -     | -      | 0.04%              | 10.20%             |
|                  | FC04         | 38.65% | 27.02% | 25.93% | -      | -      | -      | -      | -     | -     | -      | 0.03%              | 8.37%              |
|                  | FC05         | 37.69% | 32.90% | 20.61% | -      | -      | -      | -      | -     | -     | -      | 0.03%              | 8.77%              |
| 4 isolates       | FC06         | 24.86% | 27.02% | 10.85% | 29.31% | -      | -      | -      | -     | -     | -      | 0.03%              | 7.93%              |
|                  | FC07         | 27.00% | 22.48% | 19.38% | 23.29% | -      | -      | -      | -     | -     | -      | 0.03%              | 7.82%              |
|                  | FC08         | 25.38% | 21.89% | 19.98% | 24.77% | -      | -      | -      | -     | -     | -      | 0.03%              | 7.95%              |
|                  | FC09         | 21.06% | 27.26% | 23.02% | 20.84% | -      | -      | -      | -     | -     | -      | 0.03%              | 7.79%              |
|                  | FC10         | 19.94% | 21.04% | 23.76% | 27.95% | -      | -      | -      | -     | -     | -      | 0.03%              | 7.27%              |
| 5 isolates       | FC11         | 15.07% | 21.60% | 13.08% | 15.42% | 23.75% | -      | -      | -     | -     | -      | 0.04%              | 11.03%             |
|                  | FC12         | 15.94% | 21.16% | 12.98% | 17.41% | 23.64% | -      | -      | -     | -     | -      | 0.04%              | 8.84%              |
|                  | FC13         | 17.22% | 19.87% | 13.56% | 16.98% | 22.51% | -      | -      | -     | -     | -      | 0.04%              | 9.82%              |
|                  | FC14         | 18.67% | 24.83% | 17.54% | 22.37% | 9.03%  | -      | -      | -     | -     | -      | 0.03%              | 7.54%              |
|                  | FC15         | 15.36% | 23.67% | 13.70% | 16.20% | 22.15% | -      | -      | -     | -     | -      | 0.03%              | 8.88%              |
| 7 isolates       | FC16         | 14.77% | 15.76% | 13.40% | 17.04% | 14.86% | 4.32%  | 12.80% | -     | -     | -      | 0.03%              | 7.02%              |
|                  | FC17         | 14.21% | 15.52% | 12.68% | 18.98% | 16.45% | 3.81%  | 11.04% | -     | -     | -      | 0.02%              | 7.29%              |
|                  | FC18         | 14.45% | 18.30% | 8.89%  | 20.24% | 15.92% | 5.70%  | 9.25%  | -     | -     | -      | 0.02%              | 7.23%              |
|                  | FC19         | 14.58% | 18.47% | 6.45%  | 21.63% | 13.87% | 3.16%  | 14.16% | -     | -     | -      | 0.03%              | 7.65%              |
|                  | FC20         | 27.24% | 14.09% | 9.40%  | 15.50% | 12.47% | 4.25%  | 10.19% | -     | -     | -      | 0.02%              | 6.84%              |
| 10 isolates      | FC21         | 6.41%  | 11.56% | 9.64%  | 14.78% | 7.00%  | 8.98%  | 10.44% | 6.90% | 5.03% | 11.29% | 0.01%              | 7.95%              |
|                  | FC22         | 5.95%  | 13.09% | 7.24%  | 16.72% | 2.11%  | 10.97% | 8.26%  | 8.71% | 5.75% | 13.48% | 0.01%              | 7.69%              |
|                  | FC23         | 9.97%  | 11.23% | 11.24% | 14.07% | 6.49%  | 8.81%  | 10.42% | 6.52% | 5.45% | 8.12%  | 0.02%              | 7.66%              |
|                  | FC24         | 10.16% | 11.46% | 8.45%  | 17.46% | 10.19% | 10.66% | 4.36%  | 4.33% | 3.88% | 12.21% | 0.01%              | 6.83%              |
|                  | FC25         | 9.66%  | 12.63% | 11.52% | 15.22% | 8.74%  | 7.51%  | 7.48%  | 6.58% | 3.81% | 10.37% | 0.01%              | 6.47%              |
