# Supplementary material for: Evaluation of Salmonella Serotype Prediction With Multiplex Nanopore Sequencing
Source: PubMed Central journal article supplement (PMC7987803; doi:10.3389/fmicb.2021.637771), 2021-03-10
Supplement: Table_2.pdf [file Table_2.pdf]

**Supplementary Table 2.** Identification of cross-assigned reads

| Flow cell & Barcode ID | Isolate ID  | Recorded serotype (antigen profile) | SeqSero2 serotype reads (antigen profile)                                          | predicted using raw reads | Subject seq-id | Read length | Read Quality | Barcode (Score) | Query seq-id                                          | Alignment length | Identity (percentage) | Number of identical matches | Query coverage per subject | Query coverage per HSP |
|------------------------|-------------|-------------------------------------|------------------------------------------------------------------------------------|---------------------------|----------------|-------------|--------------|-----------------|-------------------------------------------------------|------------------|-----------------------|-----------------------------|----------------------------|------------------------|
|                        |             |                                     |                                                                                    |                           |                |             |              |                 | O-9_46_wzy__1191                                      | 1206             | 94.28                 | 1137                        | 100                        | 100                    |
| FC10-BC01              | FSL R9-3346 | Typhimurium (1,4,[5],12::1,2)       | Stratford (1,3,19::1,2)                                                            |                           | Read No. 1     | 11132       | 12.6         | BC01 (95.8)     | O-3_10_wzx__1539                                      | 1553             | 94.33                 | 1465                        | 100                        | 100                    |
|                        |             |                                     |                                                                                    |                           |                |             |              |                 | fljB_e_n_z15_Braenderupstr_AOZM01000055_e__1496       | 1505             | 94.22                 | 1418                        | 100                        | 100                    |
|                        |             |                                     |                                                                                    |                           |                |             |              |                 | fljB_e_n_z15_from-Chailey_SRR1049702_e__1506          | 1515             | 94.13                 | 1426                        | 100                        | 100                    |
|                        |             |                                     |                                                                                    |                           | Read No. 2     | 6279        | 13.6         | BC03 (100)      |                                                       |                  |                       |                             |                            |                        |
|                        |             |                                     |                                                                                    |                           |                |             |              |                 | fljB_e_n_z15_Mbandakastr_AMRS01000032_e__1496         | 1505             | 95.28                 | 1434                        | 100                        | 100                    |
| FC19-BC03              | FSL S5-0658 | Senftenberg (1,3,19:g,[s],t:-)      | This predicted serotype is not in the Kauffman-White scheme (1,3,19:g,s,t:e,n,z15) |                           |                |             |              |                 | fljB_e_n_z15_Salmonella.enterica_Uno_AY353325_e__1506 | 1515             | 94.26                 | 1428                        | 100                        | 100                    |
|                        |             |                                     |                                                                                    |                           |                |             |              |                 | fljB_e_n_z15_Braenderupstr_AOZM01000055_e__1496       | 1518             | 93.15                 | 1414                        | 100                        | 100                    |
|                        |             |                                     |                                                                                    |                           | Read No. 3     | 15476       | 12.6         | BC03 (100)      |                                                       |                  |                       |                             |                            |                        |
|                        |             |                                     |                                                                                    |                           |                |             |              |                 | fljB_e_n_z15_Mbandakastr_AMRS01000032_e__1496         | 1518             | 94.2                  | 1430                        | 100                        | 100                    |
